# Supplementary material
Source: MDPI journal article supplement (https://www.mdpi.com/2076-3417/13/11/6445)
Supplement: s1 [file s1]

## Corrective Exercise Programs

Player's Code: \_\_\_\_/\_\_\_\_

Frequency: 2 times per week

Program's Code:

**1**

|                                                                                                            |                                                                                                             |                                                                                                              |
|------------------------------------------------------------------------------------------------------------|-------------------------------------------------------------------------------------------------------------|--------------------------------------------------------------------------------------------------------------|
| 1.<br><br>1 X 5/ 5 secs  | 2.<br><br>1 X 5/ 5 secs   | 3.<br><br>1 X 5/ 5 secs  |
| 4.<br><br>1 X 5/ 5 secs | 5.<br><br>1 X 20         | 6.<br><br>1 X 5/ 5 secs  |
| 7.<br><br>1 X 15        | 8.<br><br>1 X 20         | 9.<br><br>1 X 15         |
| 10.<br><br>1 X 20       | 11.<br><br>1 X 5/ 5 secs | 12.<br><br>1 X 5/ 5 secs |

Player's Code: \_\_\_\_/\_\_\_\_

Frequency: 2 times per week

Program's Code:

**2**

|                                                                                                                     |                                                                                                                     |                                                                                                                      |
|---------------------------------------------------------------------------------------------------------------------|---------------------------------------------------------------------------------------------------------------------|----------------------------------------------------------------------------------------------------------------------|
| 1.<br><div>1 X 10/ 5 secs</div>  | 2.<br><div>1 X 20</div>          | 3.<br><div>1 X 20</div>         |
| 4.<br><div>1 X 20</div>          | 5.<br><div>1 X 10/ 5 secs</div>  | 6.<br><div>1 X 10/ 5 secs</div>  |

Player's Code: \_\_\_\_/\_\_\_\_

Frequency: 2 times per week

Program's Code:

**3**

|                                                                                                                                  |                                                                                                                                   |                                                                                                                                     |
|----------------------------------------------------------------------------------------------------------------------------------|-----------------------------------------------------------------------------------------------------------------------------------|-------------------------------------------------------------------------------------------------------------------------------------|
| 1.<br><div>1 X 5/ 5 secs</div> <div>L.</div>    | 2.<br><div>1 X 5/ 5 secs</div> <div>L.</div>     | 3.<br><div>1 X 10/ 5 secs</div> <div>L.</div>    |
| 4.<br><div>1 X 5/ 5 secs</div> <div>R.</div>  | 5.<br><div>1 X 20</div>                        | 6.<br><div>1 X 5/ 5 secs</div>                  |
| 7.<br><div>1 X 15</div> <div>L.</div>         | 8.<br><div>1 X 20</div>                        | 9.<br><div>1 X 5/ 5 secs</div> <div>R.</div>   |
| 10.<br><div>1 X 20</div> <div>L.</div>        | 11.<br><div>1 X 5/ 5 secs</div> <div>L.</div>  | 12.<br><div>1 X 5/ 5 secs</div> <div>L.</div>  |

Player's Code: \_\_\_\_/\_\_\_\_

Frequency: 2 times per week

Program's Code:

4

|                                                                                                                    |                                                                                                                     |                                                                                                                       |
|--------------------------------------------------------------------------------------------------------------------|---------------------------------------------------------------------------------------------------------------------|-----------------------------------------------------------------------------------------------------------------------|
| 1.<br><div>1 X 5/ 5 secs</div> 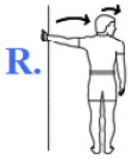   | 2.<br><div>1 X 5/ 5 secs</div>     | 3.<br><div>1 X 10/ 5 secs</div>    |
| 4.<br><div>1 X 5/ 5 secs</div>  | 5.<br><div>1 X 20</div>          | 6.<br><div>1 X 5/ 5 secs</div>    |
| 7.<br><div>1 X 15</div>         | 8.<br><div>1 X 20</div>          | 9.<br><div>1 X 5/ 5 secs</div>   |
| 10.<br><div>1 X 20</div>        | 11.<br><div>1 X 5/ 5 secs</div>  | 12.<br><div>1 X 5/ 5 secs</div>  |

Player's Code: \_\_\_\_/\_\_\_\_

Frequency: 2 times per week

Program's Code:

5

|                                                                                                                                  |                                                                                                                     |                                                                                                                            |
|----------------------------------------------------------------------------------------------------------------------------------|---------------------------------------------------------------------------------------------------------------------|----------------------------------------------------------------------------------------------------------------------------|
| 1.<br><div>1 X 5/ 5 secs</div> <div>L.</div>  | 2.<br><div>1 X 10/ 5 secs</div>  | 3.<br><div>1 X 15</div> <div>L.</div>  |
| 4.<br><div>1 X 20/ 5 secs</div>               | 5.<br><div>1 X 20</div>          | 6.<br><div>1 X 5/ 5 secs</div>         |

Player's Code: \_\_\_\_/\_\_\_\_

Frequency: 2 times per week

Program's Code:

6

|                                                                                                                                |                                                                                                                    |                                                                                                                           |
|--------------------------------------------------------------------------------------------------------------------------------|--------------------------------------------------------------------------------------------------------------------|---------------------------------------------------------------------------------------------------------------------------|
| 1.<br><b>R.</b><br><br><b>1 X 5/ 5 secs</b> | 2.<br><br><b>1 X 10/ 5 secs</b> | 3.<br><b>R.</b><br><br><b>1 X 15</b> |
| 4.<br><br><b>1 X 20/ 5 secs</b>             | 5.<br><br><b>1 X 20</b>         | 6.<br><br><b>1 X 5/ 5 secs</b>        |

Player's Code: \_\_\_\_/\_\_\_\_

Frequency: 2 times per week

Program's Code:

**7**

|                                                                                                                         |                                                                                                                    |                                                                                                                      |
|-------------------------------------------------------------------------------------------------------------------------|--------------------------------------------------------------------------------------------------------------------|----------------------------------------------------------------------------------------------------------------------|
| 1.<br><div>1 X 10</div>              | 2.<br><div>1 X 10/ Alt</div>    | 3.<br><div>1 X 10/ 5 secs</div>  |
| 4.<br><div>1 X 5/ 5 secs/ Alt</div>  | 5.<br><div>1 X 5/ 5 secs</div>  | 6.<br><div>1 X 20</div>         |

Player's Code: \_\_\_\_/\_\_\_\_

Frequency: 2 times per week

Program's Code:

8

|                                                                                                                    |                                                                                                                    |                                                                                                                      |
|--------------------------------------------------------------------------------------------------------------------|--------------------------------------------------------------------------------------------------------------------|----------------------------------------------------------------------------------------------------------------------|
| 1.<br><div>1 X 5/ 5 secs</div>  | 2.<br><div>1 X 5/ 5 secs</div>  | 3.<br><div>1 X 5/ 5 secs</div>  |
| 4.<br><div>1 X 5/ 5 secs</div>  | 5.<br><div>1 X 10</div>         | 6.<br><div>1 X 5/ 5 secs</div>  |



Player's Code: \_\_\_\_/\_\_\_\_

Frequency: 2 times per week

Program's Code:

9

1.

1 X 10/ 5 secs

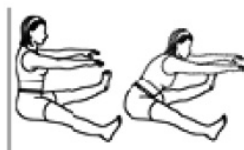

2.

1 X 10/ 5 secs

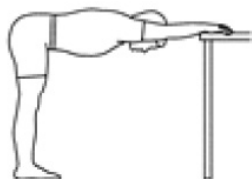

3.

1 X 5/ 5 secs/Alt

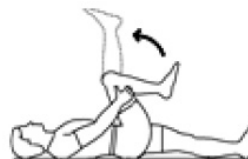

Player's Code: \_\_\_\_/\_\_\_\_

Frequency: 2 times per week

Program's Code:

**10**

|                                                                                                             |                                                                                                                 |                                                                                                              |
|-------------------------------------------------------------------------------------------------------------|-----------------------------------------------------------------------------------------------------------------|--------------------------------------------------------------------------------------------------------------|
| 1.<br>1 X 10/ 5 secs<br>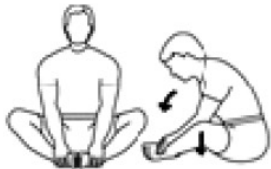 | 2.<br>1 X 10/ 5 secs<br>     | 3.<br>1 X 5/ 5 secs<br> |
| 4.<br>1 X 5/ 5 secs<br>  | 5.<br>1 X 5/ 5 secs/ Alt<br> | 6.<br>1 X 5/ 5 secs<br>  |

Player's Code: \_\_\_\_/\_\_\_\_

Frequency: 2 times per week

Program's Code:

**11**

1.

1 X 5/ 5 secs

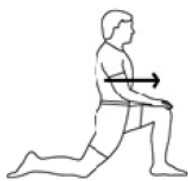

2.

1 X 5/ 5 secs

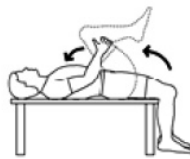

3.

1 X 5/ 5 secs

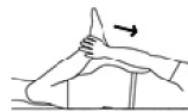

Player's Code: \_\_\_\_/\_\_\_\_

Frequency: 2 times per week

Program's Code:

**12**

1.

1 X 5/ 5 secs

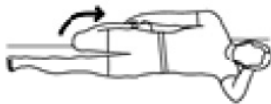

2.

1 X 5/ 5 secs

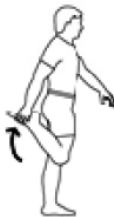

3.

1 X 5/ 5 secs

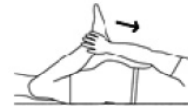

Player's Code: \_\_\_\_/\_\_\_\_

Frequency: 2 times per week

Program's Code:

**13**

1.

1 X 5/ 5 secs

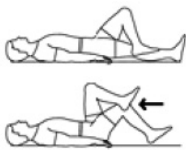

2.

1 X 5/ 5 secs

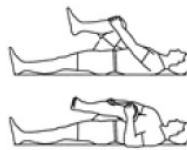

3.

1 X 10/ 5 secs

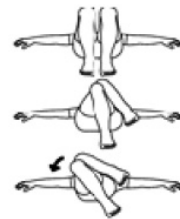

4.

1 X 5/ 5 secs

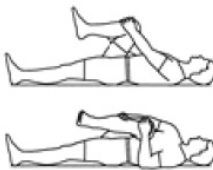

5.

1 X 5/ 5 secs

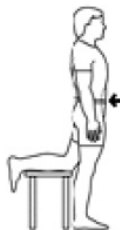

6.

1 X 5/ 5 secs

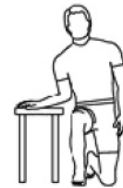

Player's Code: \_\_\_\_/\_\_\_\_

Frequency: 2 times per week

Program's Code:

**14**

|                                                                                                                    |                                                                                                                     |                                                                                                                      |
|--------------------------------------------------------------------------------------------------------------------|---------------------------------------------------------------------------------------------------------------------|----------------------------------------------------------------------------------------------------------------------|
| 1.<br><div>1 X 5/ 5 secs</div>  | 2.<br><div>1 X 10/ 5 secs</div>  | 3.<br><div>1 X 5/ 5 secs</div>  |
| 4.<br><div>1 X 5/ 5 secs</div>  | 5.<br><div>1 X 5/ 5 secs</div>   | 6.<br><div>1 X 10/ 5 secs</div>  |

Player's Code: \_\_\_\_/\_\_\_\_

Frequency: 2 times per week

Program's Code:

**15**

|                                                                                                                     |                                                                                                                     |                                                                                                                      |
|---------------------------------------------------------------------------------------------------------------------|---------------------------------------------------------------------------------------------------------------------|----------------------------------------------------------------------------------------------------------------------|
| 1.<br><div>1 X 5/ 5 secs</div>   | 2.<br><div>1 X 10/ 5 secs</div>  | 3.<br><div>1 X 5/ 5 secs</div>  |
| 4.<br><div>1 X 10/ 5 secs</div>  | 5.<br><div>1 X 5/ 5 secs</div>   | 6.<br><div>1 X 5/ 5 secs</div>   |

Player's Code: \_\_\_\_/\_\_\_\_

Frequency: 2 times per week

Program's Code:

**16**

|                                                                                                                |                                                                                                            |                                                                                                                  |
|----------------------------------------------------------------------------------------------------------------|------------------------------------------------------------------------------------------------------------|------------------------------------------------------------------------------------------------------------------|
| 1.<br>1 X 5/ 5 secs/Alt<br> | 2.<br>1 X 5/ 5 secs<br> | 3.<br>1 X 5/ 5 secs<br>     |
| 4.<br>1 X 5/ 5 secs<br>     | 5.<br>1 X 5/ 5 secs<br> | 6.<br>1 X 5/ 5 secs/Alt<br> |



Player's Code: \_\_\_\_/\_\_\_\_

Frequency: 2 times per week

Program's Code:

**17**

|                                                                                                                        |                                                                                                                   |                                                                                                                      |
|------------------------------------------------------------------------------------------------------------------------|-------------------------------------------------------------------------------------------------------------------|----------------------------------------------------------------------------------------------------------------------|
| <p>1.</p> <p>1 X 5/ 5 secs/ Alt</p> 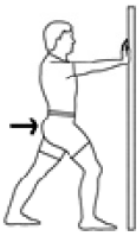 | <p>2.</p> <p>1 X 5/ 5 secs</p>  | <p>3.</p> <p>1 X 5/ 5 secs</p>  |
| <p>4.</p> <p>1 X 5/ 5 secs</p>      |                                                                                                                   |                                                                                                                      |
